# Supplementary material for: Association of rare predicted loss-of-function variants of influenza-related type I IFN genes with critical COVID-19 pneumonia
Source: JCI journal article supplement (doi:10.1172/jci152474), 2021-06-24
Supplement: sd1 [file 1]

## COVID Human Genetic Effort (CHGE)

Ahmad Abou Tayoun<sup>1</sup>, Alessandro Aiuti<sup>2</sup>, Saleh Al-Muhsen<sup>3</sup>, Fahd Al-Mulla<sup>4</sup>, Mark S. Anderson<sup>5</sup>, Evangelos Andreacos<sup>6</sup>, Andrés A. Arias<sup>7</sup>, Jose Luis Franco<sup>7</sup>, Lisa M. Arkin<sup>8</sup>, Takaki Asano<sup>9</sup>, Hagit Baris Feldman<sup>10</sup>, Alexandre Belot<sup>11</sup>, Vivien Béziat<sup>12</sup>, Catherine M. Biggs<sup>13</sup>, Dusan Bogunovic<sup>14</sup>, Bertrand Boisson<sup>15</sup>, Alexandre Bolze<sup>16</sup>, Anastasiia Bondarenko<sup>17</sup>, Ahmed A. Bousfiha<sup>18</sup>, Petter Brodin<sup>19</sup>, Manish J. Butte<sup>20</sup>, Giorgio Casari<sup>21</sup>, John Christodoulou<sup>22</sup>, Michael J. Ciancanelli<sup>23</sup>, Roger Colobran Oriol<sup>24</sup>, Antonio Condino-Neto<sup>25</sup>, Stefan N. Constantinescu<sup>26</sup>, Megan A. Cooper<sup>27</sup>, Clifton L. Dalgard<sup>28</sup>, Beth A. Drolet<sup>29</sup>, Sara Espinosa-Padilla<sup>30</sup>, Jacques Fellay<sup>31</sup>, Carlos Flores<sup>32</sup>, Peter K. Gregersen<sup>33</sup>, Filomeen Haerynck<sup>34</sup>, David Hagin<sup>35</sup>, Rabih Halwani<sup>36</sup>, Lennart Hammarström<sup>37</sup>, James R. Heath<sup>38</sup>, Sarah E. Henrickson<sup>39</sup>, Elena W. Hsieh<sup>40</sup>, Eystein Husebye<sup>41</sup>, Kohsuke Imai<sup>42</sup>, Yuval Itan<sup>43</sup>, Erich D. Jarvis<sup>44</sup>, Emmanuelle Jouanguy<sup>45</sup>, Timokratis Karamitros<sup>46</sup>, Kai Kisand<sup>47</sup>, Cheng-Lung Ku<sup>48</sup>, Yu-Lung Lau<sup>49</sup>, Yun Ling<sup>5</sup> Carrie L. Lucas<sup>51</sup>, Davood Mansouri<sup>52</sup>, Isabelle Meyts<sup>53</sup>, Kristina Mironska<sup>54</sup>, Trine H. Mogensen<sup>55</sup>, Tomohiro Morio<sup>56</sup>, Lisa F.P. Ng<sup>57</sup>, Giuseppe Novelli<sup>58</sup>, Antonio Novelli<sup>59</sup>, Satoshi Okada<sup>60</sup>, Keisuke Okamoto<sup>61</sup>, Tayfun Ozcelik<sup>62</sup>, Qiang Pan-Hammarström<sup>63</sup>, Rebeca Perez de Diego<sup>64</sup>, Jordi Perez-Tur<sup>65</sup>, Anna M. Planas<sup>66</sup>, Carolina Prando<sup>67</sup>, Anne Puel<sup>68</sup>, Aurora Pujol<sup>69</sup>, Lluís Quintana-Murci<sup>70</sup>, Laurent Renia<sup>71</sup>, Igor Resnick<sup>72</sup>, Carlos Rodríguez-Gallego<sup>73</sup>, Vanessa Sancho-Shimizu<sup>74</sup>, Anna Sediva<sup>75</sup>, Mikko R. J. Seppänen<sup>76</sup>, Mohammed Shahrooei<sup>77</sup>, Anna Shcherbina<sup>78</sup>, Ondrej Slaby<sup>79</sup>, Andrew L. Snow<sup>80</sup>, Pere Soler-Palacín<sup>81</sup>, Andrés N. Spaan<sup>82</sup>, Ivan Tancevski<sup>83</sup>, Stuart G. Tangye<sup>84</sup>, Stuart Turvey<sup>85</sup>, Furkan Uddin<sup>86</sup>, Mohammed J. Uddin<sup>87</sup>, Diederik van de Beek<sup>88</sup>, Donald C. Vinh<sup>89</sup>, Horst von Bernuth<sup>90</sup>, Mayana Zatz<sup>91</sup>, Shen-Ying Zhang<sup>92</sup>

<sup>1</sup>Al Jalila Genomics Center, Al Jalila Children's Hospital, Dubai, UAE; Genetics Department, Center for Genomic Discovery, Mohammed Bin Rashid University of Medicine and Health Sciences, Dubai, UAE. <sup>2</sup>San Raffaele Telethon Institute for Gene Therapy, IRCCS Ospedale San Raffaele, and Vita Salute San Raffaele University, Milan, Italy. <sup>3</sup>Immunology Research Laboratory, Department of Pediatrics, College of Medicine and King Saud University Medical City, King Saud University, Riyadh, Saudi Arabia. <sup>4</sup>Dasman Diabetes Institute, Department of Genetics and Bioinformatics, Dasman, Kuwait. <sup>5</sup>Diabetes Center, University of California San Francisco, San Francisco, CA, USA. <sup>6</sup>Laboratory of Immunobiology, Center for Clinical, Experimental Surgery and Translational Research, Biomedical Research Foundation of the Academy of Athens, Athens, Greece. <sup>7</sup>Universidad de Antioquia, Group of Primary Immunodeficiencies, Antioquia, Colombia. <sup>8</sup>Pediatric Dermatology, University of Wisconsin School of Medicine, Madison, WI, USA. <sup>9</sup>St. Giles Laboratory of Human Genetics of Infectious Diseases, Rockefeller Branch, The Rockefeller University, New York, NY, USA. <sup>10</sup>The Genetics Institute, Tel Aviv Sourasky Medical Center and Sackler Faculty of Medicine, Tel Aviv University, Tel Aviv, Israel. <sup>11</sup>Pediatric Nephrology, Rheumatology, Dermatology, HFME, Hospices Civils de Lyon, National Referee Centre RAISE, and INSERM U1111, Université de Lyon, Lyon, France. <sup>12</sup>St. Giles Laboratory of Human Genetics of Infectious Diseases, Rockefeller Branch, The Rockefeller University, New York, NY, USA; Laboratory of Human Genetics of Infectious Diseases, Necker Branch, INSERM U1163, Necker Hospital for Sick Children, Paris, France; University of Paris, Imagine Institute, Paris, France. <sup>13</sup>Department of Pediatrics, British Columbia Children's Hospital, The University of British Columbia, Vancouver, BC, Canada. <sup>14</sup>Icahn School of Medicine at Mount Sinai, New York, NY, USA. <sup>15</sup>St. Giles Laboratory of Human Genetics of Infectious Diseases, Rockefeller Branch, The Rockefeller University, New York, NY, USA; Laboratory of Human Genetics of Infectious Diseases, Necker Branch, INSERM U1163, Necker Hospital for Sick Children, Paris, France; University of Paris, Imagine Institute, Paris, France. <sup>16</sup>Helix, San Mateo, CA, USA. <sup>17</sup>Shupyk

National Medical Academy for Postgraduate Education, Kiev, Ukraine. <sup>18</sup>Clinical Immunology Unit, Department of Pediatric Infectious Disease, CHU Ibn Rushd and LICIA, Laboratoire d'Immunologie Clinique, Inflammation et Allergie, Faculty of Medicine and Pharmacy, Hassan II University, Casablanca, Morocco. <sup>19</sup>SciLifeLab, Department Of Women's and Children's Health, Karolinska Institutet, Stockholm, Sweden. <sup>20</sup>Division of Immunology, Allergy, and Rheumatology, Department of Pediatrics and the Department of Microbiology, Immunology, and Molecular Genetics, University of California, Los Angeles, CA, USA. <sup>21</sup>Medical Genetics, IRCCS Ospedale San Raffaele, Milan, Italy. <sup>22</sup>Murdoch Children's Research Institute and Department of Paediatrics, University of Melbourne, Victoria, Australia. <sup>23</sup>St. Giles Laboratory of Human Genetics of Infectious Diseases, Rockefeller Branch, The Rockefeller University, New York, NY, USA; Turnstone Biologics, New York, NY, USA. <sup>24</sup>Hospital Universitari Vall d'Hebron (HUVH); Vall d'Hebron Institut de Recerca (VHIR), Barcelona, Spain <sup>25</sup>Department of Immunology, Institute of Biomedical Sciences, University of São Paulo, São Paulo, Brazil. <sup>26</sup>Duve Institute and Cliniques Universitaires Saint Luc, Université catholique de Louvain, Brussels, Belgium. <sup>27</sup>Washington University School of Medicine, St. Louis, MO, USA. <sup>28</sup>Department of Anatomy, Physiology & Genetics, Uniformed Services University of the Health Sciences, Bethesda, MD, USA. <sup>29</sup>School of Medicine and Public Health, University of Wisconsin, Madison, WI, USA. <sup>30</sup>Instituto Nacional de Pediatría (National Institute of Pediatrics), Mexico City, Mexico. <sup>31</sup>School of Life Sciences, Ecole Polytechnique Fédérale de Lausanne, Lausanne, Switzerland; Precision Medicine Unit, Lausanne University Hospital and University of Lausanne, Lausanne, Switzerland. <sup>32</sup>Genomics Division, Instituto Tecnológico y de Energías Renovables (ITER), Santa Cruz de Tenerife, Spain; Research Unit, Hospital Universitario N.S. de Candelaria, Santa Cruz de Tenerife, Spain; Instituto de Tecnologías Biomédicas (ITB), Universidad de La Laguna, San Cristóbal de La Laguna, Spain; CIBER de Enfermedades Respiratorias, Instituto de Salud Carlos III, Madrid, Spain. <sup>33</sup>Feinstein Institute for Medical Research, Northwell Health USA, Manhasset, NY, USA. <sup>34</sup>Department of Paediatric Immunology and Pulmonology, Centre for Primary Immunodeficiency Ghent (CPIG), PID Research Laboratory, Jeffrey Modell Diagnosis and Research Centre, Ghent University Hospital, Edegem, Belgium. <sup>35</sup>The Genetics Institute Tel Aviv Sourasky Medical Center, Tel Aviv, Israel. <sup>36</sup>Sharjah Institute of Medical Research, College of Medicine, University of Sharjah, Sharjah, United Arab Emirates. <sup>37</sup>Department of Biosciences and Nutrition, Karolinska Institutet, Stockholm, Sweden. <sup>38</sup>Institute for Systems Biology, Seattle, WA, USA. <sup>39</sup>Department of Pediatrics, Perelman School of Medicine at the University of Pennsylvania, Philadelphia, PA, USA; Division of Allergy and Immunology, Department of Pediatrics, Children's Hospital of Philadelphia, Philadelphia, PA, USA. <sup>40</sup>Department of Pediatrics, Section of Allergy and Immunology, Children's Hospital Colorado, University of Colorado School of Medicine, Aurora, CO, USA; Department of Immunology and Microbiology, University of Colorado School of Medicine, Aurora, CO, USA. <sup>41</sup>Department of Medicine, Haukeland University Hospital, Bergen, Norway. <sup>42</sup>Department of Community Pediatrics, Perinatal and Maternal Medicine, Tokyo Medical and Dental University (TMDU) <sup>43</sup>Institute for Personalized Medicine, Icahn School of Medicine at Mount Sinai, New York, NY, USA; Department of Genetics and Genomic Sciences, Icahn School of Medicine at Mount Sinai, New York, NY, USA. <sup>44</sup>Laboratory of Neurogenetics of Language and Howard Hughes Medical Institute, The Rockefeller University, New York, NY, USA. <sup>45</sup>St. Giles Laboratory of Human Genetics of Infectious Diseases, Rockefeller Branch, The Rockefeller University, New York, NY, USA; Laboratory of Human Genetics of Infectious Diseases, Necker Branch, INSERM U1163, Necker Hospital for Sick Children, Paris, France; University of Paris, Imagine Institute, Paris, France. <sup>46</sup>Bioinformatics and Applied Genomics Unit, Department of Microbiology, Hellenic Pasteur Institute, Athens, Greece. <sup>47</sup>Molecular Pathology, Department of Biomedicine, Institute of Biomedicine and Translational Medicine, University of Tartu, Tartu Estonia. <sup>48</sup>Chang Gung University, Taoyuan County, Taiwan. <sup>49</sup>Department of Paediatrics &

Adolescent Medicine, The University of Hong Kong, Hong Kong, China. <sup>50</sup>Shanghai Public Health Clinical Center, Fudan University, Shanghai, China. <sup>51</sup>Department of Immunobiology, Yale University School of Medicine, New Haven, CT, USA. <sup>52</sup>Department of Clinical Immunology and Infectious Diseases, National Research Institute of Tuberculosis and Lung Diseases, The Clinical Tuberculosis and Epidemiology Research Center, National Research Institute of Tuberculosis and Lung Diseases (NRITLD), Masih Daneshvari Hospital, Shahid Beheshti University of Medical Sciences, Tehran, Iran. <sup>53</sup>Department of Pediatrics, University Hospitals Leuven, Leuven, Belgium; Laboratory for Inborn Errors of Immunity, KU Leuven, Leuven, Belgium. <sup>54</sup>University Clinic for Children's Diseases, Department of Pediatric Immunology, Medical Faculty, University "St. Cyril and Methodij" Skopje, North Macedonia. <sup>55</sup>Department of Biomedicine and Department of Infectious Diseases, Aarhus University, Aarhus, Denmark. <sup>56</sup>Tokyo Medical & Dental University Hospital, Tokyo, Japan. <sup>57</sup>A\*STAR Infectious Disease Labs, Agency for Science, Technology and Research, Singapore; Lee Kong Chian School of Medicine, Nanyang Technology University, Singapore. <sup>58</sup>Department of Biomedicine and Prevention, Tor Vergata University of Rome, Rome, Italy. <sup>59</sup>Laboratory of Medical Genetics, IRCCS Bambino Gesù Children's Hospital, Rome, Italy. <sup>60</sup>Department of Pediatrics, Graduate School of Biomedical and Health Sciences, Hiroshima University, Hiroshima, Japan. <sup>61</sup>Department of Pediatrics, Tokyo Medical and Dental University, Tokyo, Japan. <sup>62</sup>Department of Molecular Biology and Genetics, Bilkent University, Bilkent - Ankara, Turkey. <sup>63</sup>Department of Biosciences and Nutrition, Karolinska Institutet, Stockholm, Sweden. <sup>64</sup>Laboratory of Immunogenetics of Human Diseases, Innate Immunity Group, IdiPAZ Institute for Health Research, La Paz Hospital, Madrid, Spain. <sup>65</sup>Institut de Biomedicina de València-CSIC, CIBERNED, Unitat Mixta de Neurologia i Genètica, IIS La Fe, Valencia, Spain. <sup>66</sup>IIBB-CSIC, IDIBAPS, Barcelona, Spain. <sup>67</sup>Faculdades Pequeno Príncipe, Instituto de Pesquisa Pelé Pequeno Príncipe, Curitiba, Brazil. <sup>68</sup>St. Giles Laboratory of Human Genetics of Infectious Diseases, Rockefeller Branch, The Rockefeller University, New York, NY, USA; Laboratory of Human Genetics of Infectious Diseases, Necker Branch, INSERM U1163, Necker Hospital for Sick Children, Paris, France; University of Paris, Imagine Institute, Paris, France. <sup>69</sup>Neurometabolic Diseases Laboratory, Bellvitge Biomedical Research Institute (IDIBELL), L'Hospitalet de Llobregat, Barcelona, Spain; Catalan Institution of Research and Advanced Studies (ICREA), Barcelona, Spain; Center for Biomedical Research on Rare Diseases (CIBERER), ISCIII, Barcelona, Spain. <sup>70</sup>Human Evolutionary Genetics Unit, CNRS U2000, Institut Pasteur, Paris, France; Human Genomics and Evolution, Collège de France, Paris, France. <sup>71</sup>A\*STAR Infectious Disease Labs, Agency for Science, Technology and Research, Singapore; Lee Kong Chian School of Medicine, Nanyang Technology University, Singapore. <sup>72</sup>University Hospital St. Marina, Varna, Bulgaria. <sup>73</sup>Department of Immunology, Hospital Universitario de Gran Canaria Dr. Negrín, Canarian Health System, Las Palmas de Gran Canaria, Spain; Department of Clinical Sciences, University Fernando Pessoa Canarias, Las Palmas de Gran Canaria, Spain. <sup>74</sup>Department of Paediatric Infectious Diseases and Virology, Imperial College London, London, UK; Centre for Paediatrics and Child Health, Faculty of Medicine, Imperial College London, London, UK. <sup>75</sup>Department of Immunology, Second Faculty of Medicine Charles University, V Uvalu, University Hospital in Motol, Prague, Czech Republic. <sup>76</sup>Adult Immunodeficiency Unit, Infectious Diseases, Inflammation Center, University of Helsinki and Helsinki University Hospital, Helsinki, Finland; Rare Diseases Center and Pediatric Research Center, Children's Hospital, University of Helsinki and Helsinki University Hospital, Helsinki, Finland. <sup>77</sup>Saeed Pathobiology and Genetics Lab, Tehran, Iran; Department of Microbiology and Immunology, Clinical and Diagnostic Immunology, KU Leuven, Leuven, Belgium. <sup>78</sup>Department of Immunology, Dmitry Rogachev National Medical Research Center of Pediatric Hematology, Oncology and Immunology, Moscow, Russia. <sup>79</sup>Central European Institute of Technology & Department of Biology, Faculty of Medicine, Masaryk University, Brno, Czech Republic. <sup>80</sup>Department of Pharmacology & Molecular

Therapeutics, Uniformed Services University of the Health Sciences, Bethesda, MD, USA.

<sup>81</sup>Pediatric Infectious Diseases and Immunodeficiencies Unit, Vall d'Hebron Barcelona Hospital Campus, Barcelona, Spain. <sup>82</sup>St. Giles Laboratory of Human Genetics of Infectious Diseases, Rockefeller Branch, The Rockefeller University, New York, NY, USA; University Medical Center Utrecht, Utrecht, The Netherlands. <sup>83</sup>Department of Internal Medicine II, Medical University of Innsbruck, Innsbruck, Austria. <sup>84</sup>Garvan Institute of Medical Research, Darlinghurst, NSW, Australia; St Vincent's Clinical School, Faculty of Medicine, UNSW Sydney, NSW, Australia. <sup>85</sup>Department of Pediatrics, British Columbia Children's Hospital, The University of British Columbia, Vancouver, BC, Canada. <sup>86</sup>Centre for Precision Therapeutics, Genetic and Genomic Medicine Centre, NeuriGen Children Healthcare, Dhaka, Bangladesh. <sup>87</sup>Mohammed Bin Rashid University of Medicine and Health Sciences, College of Medicine, Dubai, United Arab Emirates; The Centre for Applied Genomics, Department of Genetics and Genome Biology, The Hospital for Sick Children, Toronto, Ontario, Canada. <sup>88</sup>Department of Neurology, Amsterdam Neuroscience, Amsterdam University Medical Center, University of Amsterdam, Amsterdam, The Netherlands. <sup>89</sup>Department of Medicine, Division of Infectious Diseases, McGill University Health Centre, Montréal, Québec, Canada; Infectious Disease Susceptibility Program, Research Institute, McGill University Health Centre, Montréal, Québec, Canada. <sup>90</sup>Department of Pediatric Pneumology, Immunology and Intensive Care, Charité Universitätsmedizin, Berlin University Hospital Center, Berlin, Germany; Labor Berlin GmbH, Department of Immunology, Berlin, Germany; Berlin Institutes of Health (BIH), Berlin-Brandenburg Center for Regenerative Therapies, Berlin, Germany. <sup>91</sup>Biosciences Institute, University of São Paulo, São Paulo, Brazil. <sup>92</sup>St. Giles Laboratory of Human Genetics of Infectious Diseases, Rockefeller Branch, The Rockefeller University, New York, NY, USA; Laboratory of Human Genetics of Infectious Diseases, Necker Branch, INSERM U1163, Necker Hospital for Sick Children, Paris, France; University of Paris, Imagine Institute, Paris, France.
